# Supplementary material
Source: PubMed Central journal article supplement (PMC11044009)
Supplement: jama-e244303-s002.pdf [file jama-e244303-s002.pdf]

## Supplemental Online Content

Gyamfi-Bannerman C, Clifton RG, Tita ATN, et al. Eunice Kennedy Shriver Maternal-Fetal Medicine Units Network. Neurodevelopmental outcomes after late preterm antenatal corticosteroids: the ALPS follow-up study. *JAMA*. doi:10.1001/jama.2024.4303

### Trial Sites and Study Personnel

**eTable 1.** Maternal/Neonatal Characteristics for Enrolled vs. Non-Enrolled Follow-Up Participants

**eeTable 2.** Participants Excluded for Death or Developmental Delay

**eTable 3.** Comparison of Original Cohorts and Cohorts Remaining at  $\geq 6$  years

**eTable 4.** Subgroup Analysis among Preterm and Term Deliveries

This supplemental material has been provided by the authors to give readers additional information about their work.

## **Trial Sites and Study Personnel**

The members of the *Eunice Kennedy Shriver* National Institute of Child Health and Human Development Maternal-Fetal Medicine Units Network that participated in this study are as follows:

### **Clinical Centers:**

Main centers are listed below. Personnel at subsites have the subsite listed in brackets.

*University of Alabama at Birmingham, Birmingham, AL* – Alan T. N. Tita, MD, PhD, Donna Dunn, PhD, CNM, FNP-BC, Nicole Burrell, MPH, Kristy Domnanovich, PhD, Brian M. Casey, MD

*The Ohio State University, Columbus, OH* – Kara M. Rood, MD, Anna Bartholomew, MPH, BSN, Maged M. Costantine, MD, RN, CCRP, Renee Devlin, PhD, Aubrey Fowler, BS, Hannah Cackovic Henson, APRN-CNM, Paige Cackovic, BS, Jessica Cohen, BS, Alexis Neri, MPH, Sounali Perez, BS, Kayla McDaniel, BS, Samantha Wiegand, MD [Miami Valley Hospital] David S. McKenna, MD [Miami Valley Hospital], E. Kaye Snow, BSN, RN [Miami Valley Hospital], Kathleen Fennig, MS, BSN, RN [Miami Valley Hospital], Amanda Beeman, PsyD

*University of Utah Health Sciences Center, Salt Lake City, UT* –Torri D. Metz, MD, MS, Amber Sowles, RN, BSN, Michael W. Varner, MD, M. Sean Esplin, MD [Intermountain Health], Kristina Feldman, PhD, Lauren Perez, PhD, BCBA, Natalie Buerger, PhD, Kelly Stout, PhD, Emily Parker, PhD, Magenta Silberman, MEd, Amanda Nelsen, RN, BSN, Kim Hill, RN, BSN

*Brown University, Providence, RI* – Dwight J. Rouse, MD, Donna Allard, ADN, RNC, Nina K. Ayala, MD, Victoria Watson, MS, Angelica DeMartino, BSN, MS, Betty Vohr, MD

*Columbia University, New York, NY* – Cynthia Gyamfi-Bannerman, MD, MS, Sabine Z. Bousleiman, Rn, MSN, MSPH, Ronald J. Wapner, MD, Rupa Ravi, MPH, Annette Zygmunt, PhD, Adisa Velovic, MA, Brandy Firman BSPH, BSDMS, Mitzie Grant, PhD, Matthew Hoffman, MD, MPH [Christiana Care], Carrie A. Kitto [Christiana Care], Elizabeth Higley, PhD [Christiana Care], Kristy T.S. Palomares, MD, PhD [Saint Peter's University Hospital], Imene Beche, MBS [Saint Peter's University Hospital], Maria Ridley, PsyD [Saint Peter's University Hospital], Rosanne Moreno, PsyD [Saint Peter's University Hospital], Daniel Skupski, MD [New York-Presbyterian/Queens], Rosalyn Chan-Akeley MD, MPH, [New York-Presbyterian/Queens]

*University of Texas Medical Branch, Galveston, TX* – George R. Saade, MD, Ashley Salazar, DNP-WHNP, Amelia A. Nounes, RN, MSN, Lisa Thibodeaux, RNC-OB, BSN, Karen E. Smith, PhD

*MetroHealth Medical Center-Case Western Reserve University, Cleveland, OH* – Kelly Gibson, MD, Eugenia Sweet, RN, Wendy Dalton BSN, RN, Bailey Diaz, BA, Melissa Kinan BSN, RN, David Hackney, MD [University Hospitals], LuAnn Polito BS, JD, AND, Abigail Pierse, BS, Lisa Ramirez, PhD

*University of Texas Health Science Center at Houston-Children's Memorial Hermann Hospital, Houston, TX* – Suneet P. Chauhan, MD, Hon Dsc, Felecia Ortiz, RN, BSN, Kimberly Rennie, PhD, Dinorah Zanger, PhD

*University of North Carolina at Chapel Hill, Chapel Hill, NC* – John M. Thorp, Jr., MD, T. Michael O'Shea, MD, MPH, Kelly Clark, BSN, RN, Sally Timlin, MSN, RN, Kathy Lloyd, BS, Carmen Beamon, MD, MPH [WakeMed Health & Hospitals], Hannah Nunn, BA [WakeMed Health & Hospitals], Emily B. Prince, PhD., Adrienne A. Harris, PhD, Jaclyn Starritt, PhD, Laura Kirby, PhD, Maria Barber, MS

*Northwestern University, Chicago, IL* – William A. Grobman, MD, MBA, Gail Mallett, RN, MS, Elizabeth Rangel, RN, MSN, Beth Plunkett MD [NorthShore University HealthSystem], Kathy Kearns, RN BSN [NorthShore University HealthSystem], Mercedes Ramos-Brinson, BS, Annamarie Russo, MEd, CCRP, Mary Frese, PhD

*University of Colorado, Denver, CO* – Kent D. Heyborne, MD, Jocelyn Phipers RN BSN, Sarah Schwartz MSN, RN, CNE, Betsy Burke, RN BSN, Michelle Kleman, MA, LPC CSP [Children’s Hospital Colorado], Kellie Roesser, MS, CCRP [Children’s Hospital Colorado], Ashly Dalton, MEd, Leah Grande, PhD

*Duke University, Durham, NC* – Geeta K. Swamy, MD, Jennifer Ferrara, RN, Lena Fried, Brenna L. Hughes, MD, MSc, Kathryn E. Gustafson, PhD, Caitlin Stone

*Stanford University, Palo Alto, CA* – Yasser Y. El-Sayed, MD, Christine Joyce Lee, RN, Casey Krueger, PhD, Ryan Lucash, PhD, Beth Earhart, PhD, Jessica Patel, PhD, Anna Girsén, MD, PhD

Data Coordinating Center:

*The George Washington University Biostatistics Center, Washington, DC* – Rebecca G. Clifton, PhD, Elizabeth A. Thom, PhD, Jessica A. de Voest, PhD, MPH, Danielle E. Kincaid, MPH, Crystal Nwachuku, MSHS, Katia J. Barrett, MA, PMP, Pramiksha Marcharchand

NIH:

*Eunice Kennedy Shriver National Institute of Child Health and Human Development, Bethesda, MD* – Monica Longo, MD, PhD, Uma M. Reddy, MD, MPH, Menachem Miodovnik, MD

Steering Committee Chair:

*University of Texas at Austin, Austin, TX* – George A. Macones, MD, MSCE

**eTable1. Maternal/Neonatal Characteristics for Enrolled vs. Non-Enrolled Follow-Up Participants**

| <b>Characteristic</b>                  | <b>Enrolled in Follow-up Study*<br/>(N=1,026)</b> | <b>Not Enrolled in Follow-up Study*<br/>(N=1,805)</b> |
|----------------------------------------|---------------------------------------------------|-------------------------------------------------------|
| Race/ethnicity <sup>†</sup>            |                                                   |                                                       |
| American Indian / Alaskan Native       | 2 (0.2%)                                          | 5 (0.3%)                                              |
| Asian                                  | 32 (3.1%)                                         | 61 (3.4%)                                             |
| Hispanic                               | 309 (30.1%)                                       | 544 (30.1%)                                           |
| Native Hawaiian / Pacific Islander     | 3 (0.3%)                                          | 6 (0.3%)                                              |
| Non-Hispanic Black                     | 258 (25.1%)                                       | 470 (26.0%)                                           |
| Non-Hispanic White                     | 417 (40.6%)                                       | 691 (38.3%)                                           |
| More than one self-reported race       | 2 (0.2%)                                          | 5 (0.3%)                                              |
| Unknown / Not Reported                 | 3 (0.3%)                                          | 23 (1.3%)                                             |
| Age, y                                 | 29 (6.2)                                          | 28 (6.2)                                              |
| College degree or higher (maternal)    | 322/1,005 (32.0%)                                 | 406/1,766 (23.0%)                                     |
| Private insurance <sup>‡</sup>         | 444 (43.3%)                                       | 616 (34.1%)                                           |
| Employed                               | 445/1,024 (43.5%)                                 | 703/1,798 (39.1%)                                     |
| Number of prior pregnancies >=20 weeks |                                                   |                                                       |
| No prior pregnancy                     | 417 (40.6%)                                       | 720 (39.9%)                                           |

|                                                                |                   |                   |
|----------------------------------------------------------------|-------------------|-------------------|
| 1 prior pregnancy                                              | 277 (27.0%)       | 458 (25.4%)       |
| >=2 prior pregnancies                                          | 332 (32.4%)       | 627 (34.7%)       |
| Smoked during pregnancy                                        | 108 (10.5%)       | 282 (15.6%)       |
| Asthma requiring medication during pregnancy                   | 87 (8.5%)         | 168 (9.3%)        |
| Preeclampsia or gestational hypertension                       | 325 (31.7%)       | 550 (30.5%)       |
| Gestational diabetes                                           | 113 (11.0%)       | 193 (10.7%)       |
| Indication for trial entry                                     |                   |                   |
| Preterm labor with intact membranes                            | 289 (28.2%)       | 503 (27.9%)       |
| Ruptured membranes                                             | 227 (22.1%)       | 393 (21.8%)       |
| Expected delivery for gestational hypertension or preeclampsia | 276 (26.9%)       | 451 (25.0%)       |
| Expected delivery for fetal growth restriction                 | 30 (2.9%)         | 60 (3.3%)         |
| Expected delivery for oligohydramnios                          | 25 (2.4%)         | 65 (3.6%)         |
| Expected delivery for other indication                         | 179 (17.4%)       | 333 (18.4%)       |
| Treatment Assignment                                           |                   |                   |
| Active                                                         | 522 (50.9%)       | 907 (50.2%)       |
| Placebo                                                        | 504 (49.1%)       | 898 (49.8%)       |
| Cesarean delivery                                              | 325/1,026 (31.7%) | 560/1,801 (31.1%) |
| Gestational age at delivery, weeks <sup>§</sup>                | 36 (35.3,36.7)    | 36 (35.4,36.7)    |

|                                                                                                                                                                                                                                                                                                                                                                                                                                                                                                                   |                   |                   |
|-------------------------------------------------------------------------------------------------------------------------------------------------------------------------------------------------------------------------------------------------------------------------------------------------------------------------------------------------------------------------------------------------------------------------------------------------------------------------------------------------------------------|-------------------|-------------------|
| Small for gestational age (<10th percentile)                                                                                                                                                                                                                                                                                                                                                                                                                                                                      | 169/1,026 (16.5%) | 306/1,801 (17.0%) |
| Major congenital anomaly <sup>¶</sup>                                                                                                                                                                                                                                                                                                                                                                                                                                                                             | 8/1,026 (0.8%)    | 24/1,801 (1.3%)   |
| Sex                                                                                                                                                                                                                                                                                                                                                                                                                                                                                                               |                   |                   |
| Female                                                                                                                                                                                                                                                                                                                                                                                                                                                                                                            | 470/1,026 (45.8%) | 861/1,801 (47.7%) |
| Male                                                                                                                                                                                                                                                                                                                                                                                                                                                                                                              | 556/1,026 (54.2%) | 940/1,801 (52.1%) |
| <p>*Data are mean (standard deviation), median (Q1,Q3), or n (%) unless otherwise specified.<br/> <sup>†</sup>Maternal race/ethnicity was based on self-report.<br/> <sup>‡</sup>Those without private insurance have government-assisted insurance or are self-pay/uninsured.<br/> <sup>§</sup>Gestational age at delivery missing in 4.<br/> <sup>¶</sup>Although the presence of a major congenital anomaly was an exclusion criterion in the ALPS trial, these disorders were not discovered until birth.</p> |                   |                   |

**eTable2. Participants Excluded for Death or Developmental Delay**

| <b>Exclusion</b>                  | <b>Betamethasone<br/>(N=1,429)</b> | <b>Placebo<br/>(N=1,402)</b> | <b>P-value</b> |
|-----------------------------------|------------------------------------|------------------------------|----------------|
| Infant/Neonatal Death             | 6 (0.42%)                          | 4 (0.29%)                    | 0.75           |
| Childhood Death                   | 6 (0.42%)                          | 4 (0.29%)                    | 0.75           |
| Maternal Death                    | 6 (0.42%)                          | 4 (0.29%)                    | 0.75           |
| Severe Autism/Developmental Delay | 12 (0.84%)                         | 13 (0.93%)                   | 0.80           |

**eTable3. Comparison of Original Cohorts and Cohorts Remaining at ≥ 6 years**

| Characteristic                        | Original Cohort (N=2,831) |                   |                              | Unweighted Analysis Cohort (N=1,026) |                 |                              | Weighted Analysis Cohort (N=2,832)* |                   |                              |
|---------------------------------------|---------------------------|-------------------|------------------------------|--------------------------------------|-----------------|------------------------------|-------------------------------------|-------------------|------------------------------|
|                                       | Betamethasone (N=1,429)   | Placebo (N=1,402) | Standardized Mean Difference | Betamethasone (N=522)                | Placebo (N=504) | Standardized Mean Difference | Betamethasone (N=1,430)             | Placebo (N=1,402) | Standardized Mean Difference |
| Race/ethnicity                        |                           |                   | 0.116                        |                                      |                 | 0.250                        |                                     |                   | 0.258                        |
| American Indian / Alaskan Native      | 3 (0.2%)                  | 4 (0.3%)          |                              | 2 (0.4%)                             | 0 (0%)          |                              | 5 (0.3%)                            | 0 (0%)            |                              |
| Asian                                 | 56 (3.9%)                 | 37 (2.6%)         |                              | 21 (4.0%)                            | 11 (2.2%)       |                              | 54 (3.7%)                           | 27 (1.9%)         |                              |
| Hispanic                              | 405 (28.3%)               | 448 (32.0%)       |                              | 147 (28.2%)                          | 162 (32.1%)     |                              | 411 (28.7%)                         | 470 (33.5%)       |                              |
| Native Hawaiian / Pacific Islander    | 3 (0.2%)                  | 4 (0.3%)          |                              | 0 (0%)                               | 2 (0.4%)        |                              | 0 (0%)                              | 7 (0.5%)          |                              |
| Non-Hispanic Black                    | 6 (0.4%)                  | 3 (0.2%)          |                              | 3 (0.6%)                             | 0 (%)           |                              | 8 (0.5%)                            | 0 (0%)            |                              |
| Non-Hispanic White                    | 363 (25.4%)               | 365 (26.0%)       |                              | 124 (23.8%)                          | 134 (26.6%)     |                              | 370 (25.9%)                         | 404 (28.8%)       |                              |
| More than one self-reported race      | 580 (40.6%)               | 528 (37.7%)       |                              | 222 (42.5%)                          | 195 (38.7%)     |                              | 575 (40.2%)                         | 496 (35.4%)       |                              |
| Unknown / Not Reported                | 13 (0.9%)                 | 13 (0.9%)         |                              | 3 (0.6%)                             | 0 (0%)          |                              | 8 (0.5%)                            | (0%)              |                              |
| Age, y                                | 29 (6.3)                  | 28 (6.1)          | 0.127                        | 29 (6.3)                             | 29 (6.1)        | 0.065                        | 29 (6.3)                            | 28 (6.1)          | 0.126                        |
| College degree or higher (maternal)   | 381 (27.3%)               | 347 (25.2%)       | 0.047                        | 164 (32.0%)                          | 158 (32.1%)     | 0.003                        | 403 (28.7%)                         | 372 (27.2%)       | 0.033                        |
| Private insurance                     | 558 (39.0%)               | 502 (35.8%)       | 0.067                        | 228 (43.7%)                          | 216 (42.9%)     | 0.017                        | 558 (39.0%)                         | 504 (35.9%)       | 0.064                        |
| Employed                              | 577 (40.5%)               | 571 (40.8%)       | 0.005                        | 217 (41.7%)                          | 228 (45.3%)     | 0.074                        | 564 (39.5%)                         | 581 (41.5%)       | 0.041                        |
| Number of prior pregnancies ≥20 weeks |                           |                   | 0.061                        |                                      |                 | 0.118                        |                                     |                   | 0.130                        |
| No prior pregnancy                    | 565 (39.5%)               | 572 (40.8%)       |                              | 209 (40.0%)                          | 208 (41.3%)     |                              | 567 (39.7%)                         | 574 (40.9%)       |                              |

|                                                                |             |             |       |             |             |       |             |             |       |
|----------------------------------------------------------------|-------------|-------------|-------|-------------|-------------|-------|-------------|-------------|-------|
| 1 prior pregnancy                                              | 360 (25.2%) | 375 (26.7%) |       | 131 (25.1%) | 146 (29.0%) |       | 357 (25.0%) | 411 (29.3%) |       |
| >=2 prior pregnancies                                          | 504 (35.3%) | 455 (32.5%) |       | 182 (34.9%) | 150 (29.8%) |       | 506 (35.4%) | 418 (29.8%) |       |
| Smoked during pregnancy                                        | 204 (14.3%) | 186 (13.3%) | 0.029 | 55 (10.5%)  | 53 (10.5%)  | 0.001 | 205 (14.3%) | 189 (13.4%) | 0.026 |
| Asthma requiring medication during pregnancy                   | 129 (9.0%)  | 126 (9.0%)  | 0.001 | 50 (9.6%)   | 37 (7.3%)   | 0.080 | 141 (9.8%)  | 106 (7.5%)  | 0.081 |
| Preeclampsia or gestational hypertension                       | 435 (30.4%) | 440 (31.4%) | 0.020 | 168 (32.2%) | 157 (31.2%) | 0.022 | 463 (32.4%) | 422 (30.1%) | 0.049 |
| Gestational diabetes                                           | 153 (10.7%) | 153 (10.9%) | 0.007 | 54 (10.3%)  | 59 (11.7%)  | 0.043 | 149 (10.4%) | 160 (11.4%) | 0.033 |
| Indication for trial entry                                     |             |             | 0.041 |             |             | 0.142 |             |             | 0.163 |
| Preterm labor with intact membranes                            | 400 (28.0%) | 392 (28.0%) |       | 143 (27.4%) | 146 (29.0%) |       | 405 (28.3%) | 435 (31.0%) |       |
| Ruptured membranes                                             | 316 (22.1%) | 304 (21.7%) |       | 119 (22.8%) | 108 (21.4%) |       | 319 (22.3%) | 291 (20.7%) |       |
| Expected delivery for gestational hypertension or preeclampsia | 356 (24.9%) | 371 (26.5%) |       | 150 (28.7%) | 126 (25.0%) |       | 416 (29.1%) | 338 (24.1%) |       |
| Expected delivery for fetal growth restriction                 | 46 (3.2%)   | 44 (3.1%)   |       | 13 (2.5%)   | 17 (3.4%)   |       | 35 (2.4%)   | 51 (3.6%)   |       |
| Expected delivery for oligohydramnios                          | 48 (3.4%)   | 42 (3.0%)   |       | 15 (2.9%)   | 10 (2.0%)   |       | 39 (2.7%)   | 28 (2.0%)   |       |
| Expected delivery for other indication                         | 263 (18.4%) | 249 (17.8%) |       | 82 (15.7%)  | 97 (19.2%)  |       | 218 (15.2%) | 261 (18.6%) |       |
| Cesarean delivery                                              | 454 (31.8%) | 431 (30.8%) | 0.022 | 164 (31.4%) | 161 (31.9%) | 0.011 | 447 (31.3%) | 432 (30.8%) | 0.010 |
| Gestational age at delivery, weeks                             | 36.1 (1.1)  | 36.1 (1.2)  | 0.006 | 36.1 (1.1)  | 36.1 (1.2)  | 0.015 | 36.1 (1.1)  | 36.1 (1.2)  | 0.001 |
| Small for gestational age (<10th percentile)                   | 255 (17.9%) | 220 (15.7%) | 0.058 | 90 (17.2%)  | 79 (15.7%)  | 0.042 | 248 (17.3%) | 233 (16.6%) | 0.020 |
| Major congenital anomaly†                                      | 11 (0.8%)   | 21 (1.5%)   | 0.069 | 1 (0.2%)    | 7 (1.4%)    | 0.136 | 3 (0.2%)    | 20 (1.4%)   | 0.134 |



|                                                                                                                                                     |             |             |       |             |             |       |             |             |       |
|-----------------------------------------------------------------------------------------------------------------------------------------------------|-------------|-------------|-------|-------------|-------------|-------|-------------|-------------|-------|
| Sex                                                                                                                                                 |             |             | 0.051 |             |             | 0.048 |             |             | 0.057 |
| Female                                                                                                                                              | 690 (48.4%) | 641 (45.8%) |       | 233 (44.6%) | 237 (47.0%) |       | 632 (44.2%) | 660 (47.1%) |       |
| Male                                                                                                                                                | 737 (51.6%) | 759 (54.2%) |       | 289 (55.4%) | 267 (53.0%) |       | 798 (55.8%) | 743 (52.9%) |       |
| *Accounts for maternal age, insurance status, and smoking during pregnancy. N's may not total original cohort because of rounding.                  |             |             |       |             |             |       |             |             |       |
| †Although the presence of a major congenital anomaly was an exclusion criterion in the ALPS trial, these disorders were not discovered until birth. |             |             |       |             |             |       |             |             |       |

**eTable4. Subgroup Analysis among Preterm and Term Deliveries**

| <b>Outcome</b>                                        | <b>Betamethasone<br/>(N=479)</b> | <b>Placebo<br/>(N=470)</b> | <b>Unadjusted*</b>     | <b>Adjusted**†</b>     |
|-------------------------------------------------------|----------------------------------|----------------------------|------------------------|------------------------|
| <i>Primary Outcome</i>                                |                                  |                            |                        |                        |
| DAS-II General Conceptual Ability < 85‡               |                                  |                            | <i>Relative Risk</i>   | <i>Relative Risk</i>   |
| Preterm                                               | 67/398 (16.8%)                   | 67/391 (17.1%)             | 0.98 (0.72,1.34)       | 0.98 (0.73,1.30)       |
| Term                                                  | 15/81 (18.5%)                    | 20/79 (25.3%)              | 0.73 (0.40,1.33)       | 0.83 (0.49,1.42)       |
| <i>Secondary Outcomes</i>                             |                                  |                            |                        |                        |
|                                                       | <b>(N=522)</b>                   | <b>(N=504)</b>             |                        |                        |
| Social Responsiveness Scale t-score > 65§             |                                  |                            | <i>Relative Risk</i>   | <i>Relative Risk</i>   |
| Preterm                                               | 61/432 (14.1%)                   | 62/421 (14.7%)             | 0.96 (0.69,1.33)       | 0.93 (0.67,1.28)       |
| Term                                                  | 9 (10.5%)                        | 10 (12.1%)                 | 0.87 (0.37,2.03)       | 0.90 (0.39,2.08)       |
| Gross Motor Function Classification System > Level I¶ |                                  |                            |                        |                        |
| Preterm                                               | 1 (0.2%)                         | 1 (0.2%)                   |                        |                        |
| Term                                                  | 0                                | 0                          |                        |                        |
| <i>Child Behavior Checklist#</i>                      |                                  |                            |                        |                        |
| Total problems t-score**                              |                                  |                            | <i>Mean Difference</i> | <i>Mean Difference</i> |
| Preterm                                               | 48.7 (11.2)                      | 48.7 (11.3)                | -0.05 (-1.54,1.44)     | -0.38 (-1.85,1.09)     |
| Term                                                  | 47.5 (9.9)                       | 50.8 (10.9)                | -3.28 (-6.63,0.06)     | -3.25 (-6.54,0.04)     |

\*Data are n (%) or relative risk (95% CI) for categorical outcomes and mean (standard deviation) or mean difference (95% CI) for continuous outcomes.

†Adjusted for maternal age, child age, sex, maternal education, and center.

‡DAS-II denotes Differential Ability Scales 2<sup>nd</sup> Edition. The DAS-II General Conceptual Ability score has a mean of 100 and a standard deviation of 15; ≥ 85 average and < 85 below average with higher scores indicating greater abilities.

§Social Responsiveness Scale ranges: < 60 normal, 60-65 mild, 66-75 moderate, and ≥ 76 severe with higher scores indicating greater problems.

¶The Gross Motor Function Classification System has 5 levels and increasing level indicates greater functional impairment: walks without limitations, walks with limitations, walks with hand-held mobility device, self-mobility with limitations; may use powered mobility, and transported in a manual wheelchair.

#Child Behavior Checklist total problems t-score ranges: < 60 normal, 60-63 borderline (84th-90th percentile), and ≥ 64 clinical (> 90th percentile) with higher scores indicating greater problems.

\*\*Child Behavior Checklist missing in 3.
