# Supplementary material
Source: PubMed Central journal article supplement (PMC11044009)
Supplement: jama-e244303-s003.pdf [file jama-e244303-s003.pdf]

## Data Sharing Statement

Gyamfi-Bannerman. Neurodevelopmental Outcomes After Late Preterm Antenatal Corticosteroids. *JAMA*. Published April 24, 2024. doi:10.1001/jama.2024.4303

### Data

**Data available:** Yes

**Data types:** Deidentified participant data, Data dictionary

**How to access data:** <https://dash.nichd.nih.gov/>

**When available:** beginning date: 11-07-2024

### Supporting Documents

**Document types:** None

### Additional Information

**Who can access the data:** Researchers whose proposed use of the data has been approved.

**Types of analyses:** For any purpose.

**Mechanisms of data availability:** after approval of a proposal
